# Supplementary material
Source: PubMed Central journal article supplement (PMC6456256)

## **Supplemental Figure Descriptions**

**Supplemental Figure 1: Scree plots of the Eigenvalues for each dataset.**

**Supplemental Figure 2: Distribution of Systolic Blood Pressure Risk Score and Diastolic Blood Pressure Risk Score for each dataset.**

### **Supplemental Figure 3: Observed vs Reported Beta for Systolic Blood Pressure**

This figure shows the effect size estimates of individual SNPs in this study plotted against those from the original publication, for the systolic blood pressure phenotype. The X axis denotes the originally reported beta; Y axis denotes the observed betas from our study. The lines denote the regression line of reported beta on observed beta, for the particular dataset.

### **Supplemental Figure 4: Observed vs Reported Beta for Diastolic Blood Pressure**

This figure shows the effect size estimates of individual SNPs in this study plotted against those from the original publication, for the diastolic blood pressure phenotype. The X axis denotes the originally reported beta; Y axis denotes the observed betas from our study. The lines denote the regression line of reported beta on observed beta, for the particular dataset.

### **Supplemental Figure 5: Systolic and Diastolic Blood Pressure by Risk Score Quartile**

The X axis denotes the risk score quartile (1 representing the quartile with the smallest risk scores) and the Y axis denotes blood pressure. The horizontal lines indicate the average blood pressure for each quartile, and the vertical lines indicate the 95% confidence interval on each average.

# Supplemental Figure 1

## NOMAS

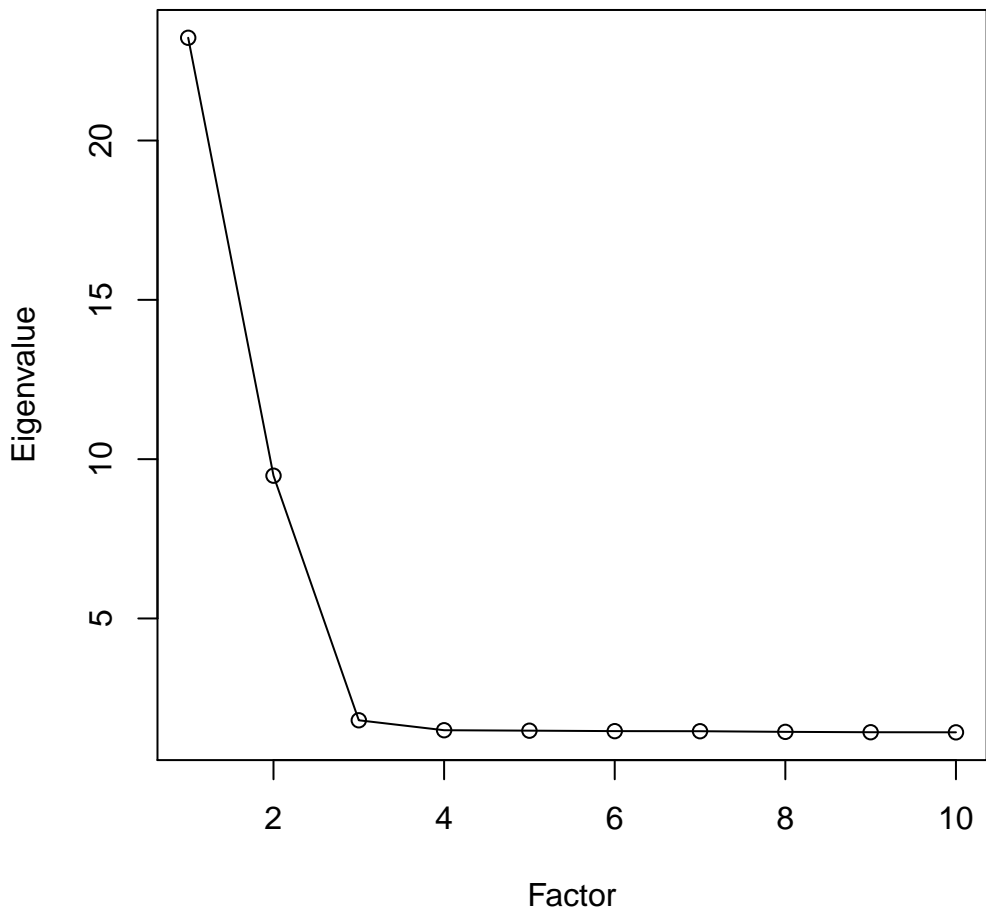

## MCR

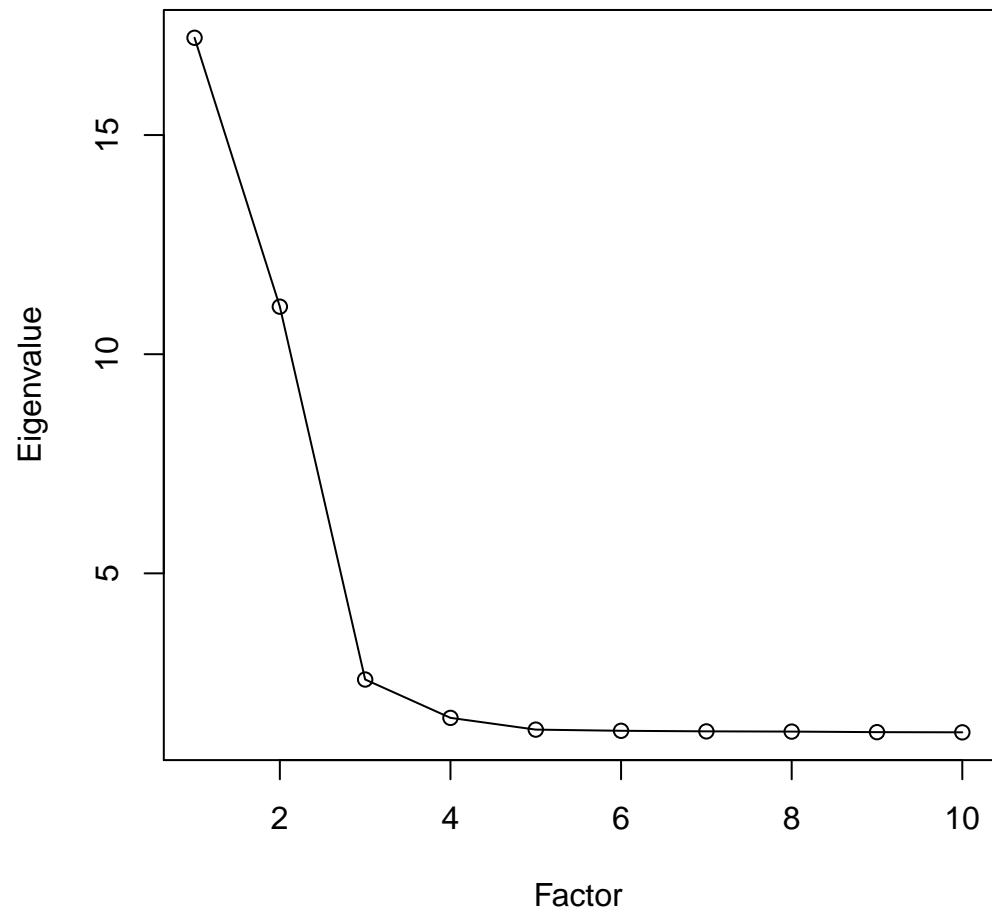

# Supplemental Figure 2

**SBP Risk Score in NOMAS**  
(skewness = 0.014)

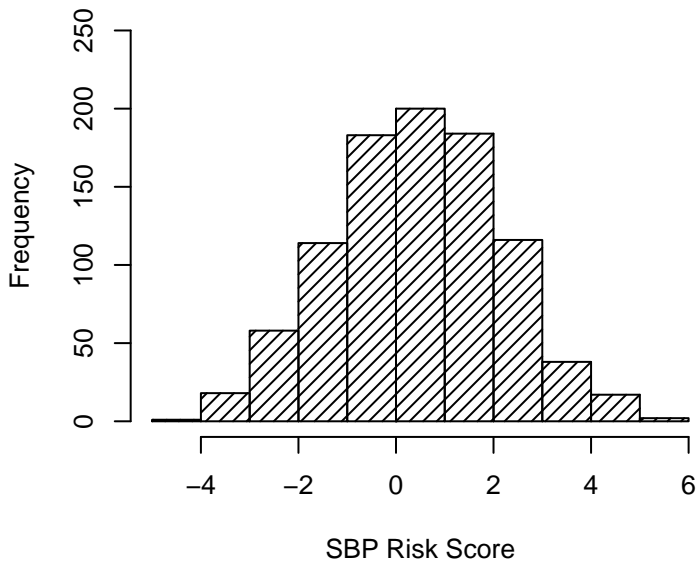

**DBP Risk Score in NOMAS**  
(skewness = 0.052)

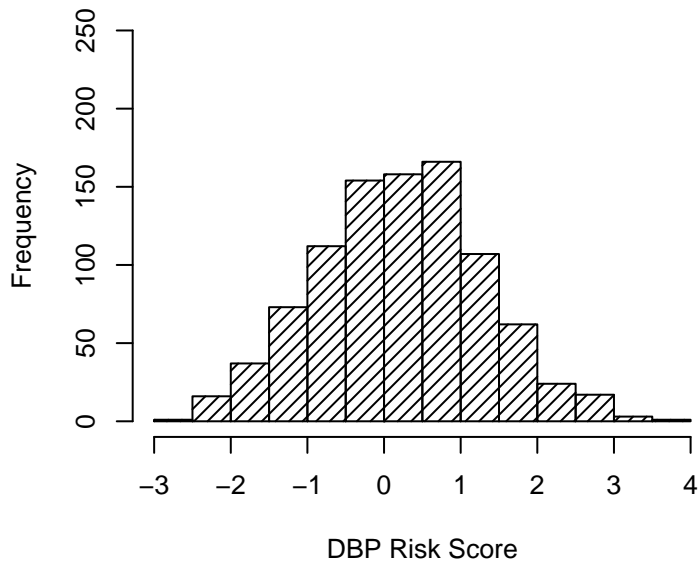

**SBP Risk Score in MCR**  
(skewness = -0.146)

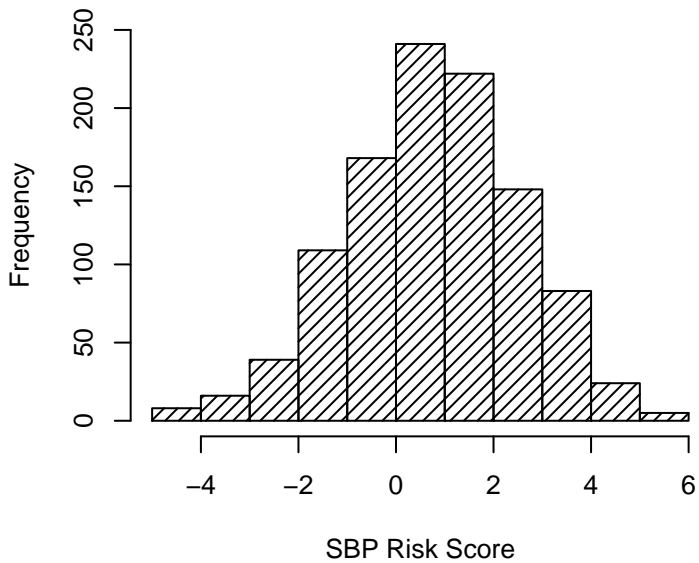

**DBP Risk Score in MCR**  
(skewness = -0.096)

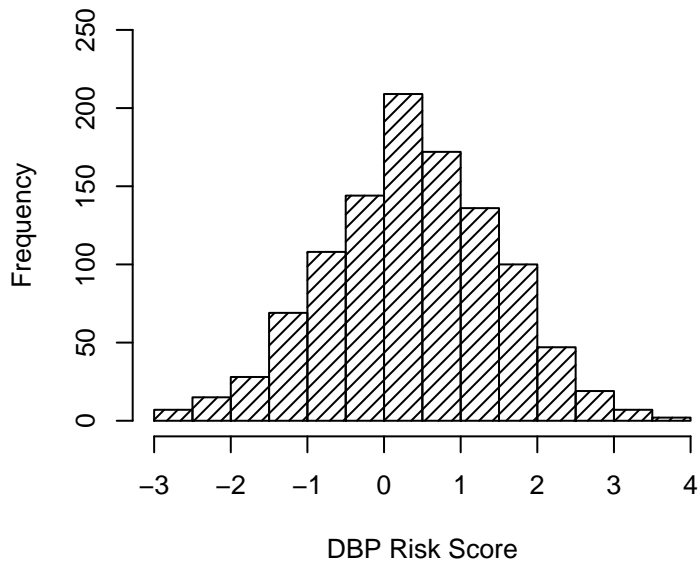

# Supplemental Figure 3

## Observed vs Reported Beta (SBP)

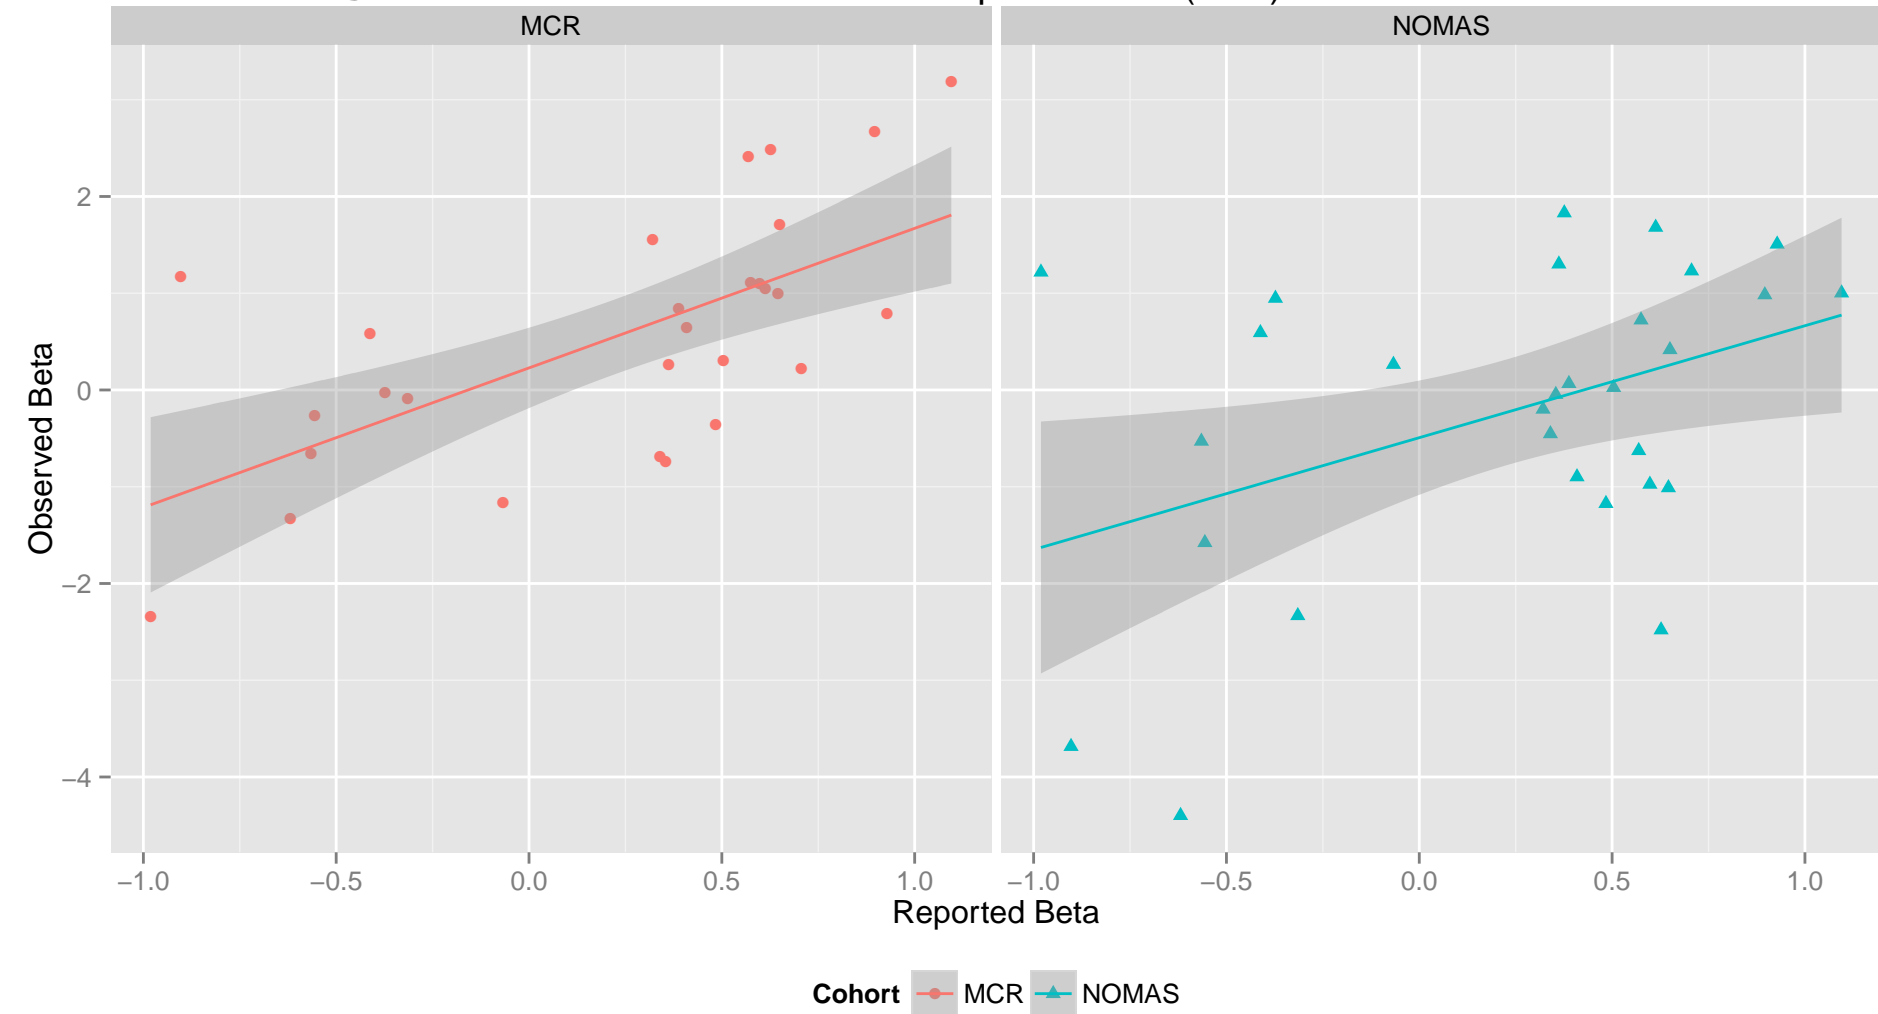

# Supplemental Figure 4

## Observed vs Reported Beta (DBP)

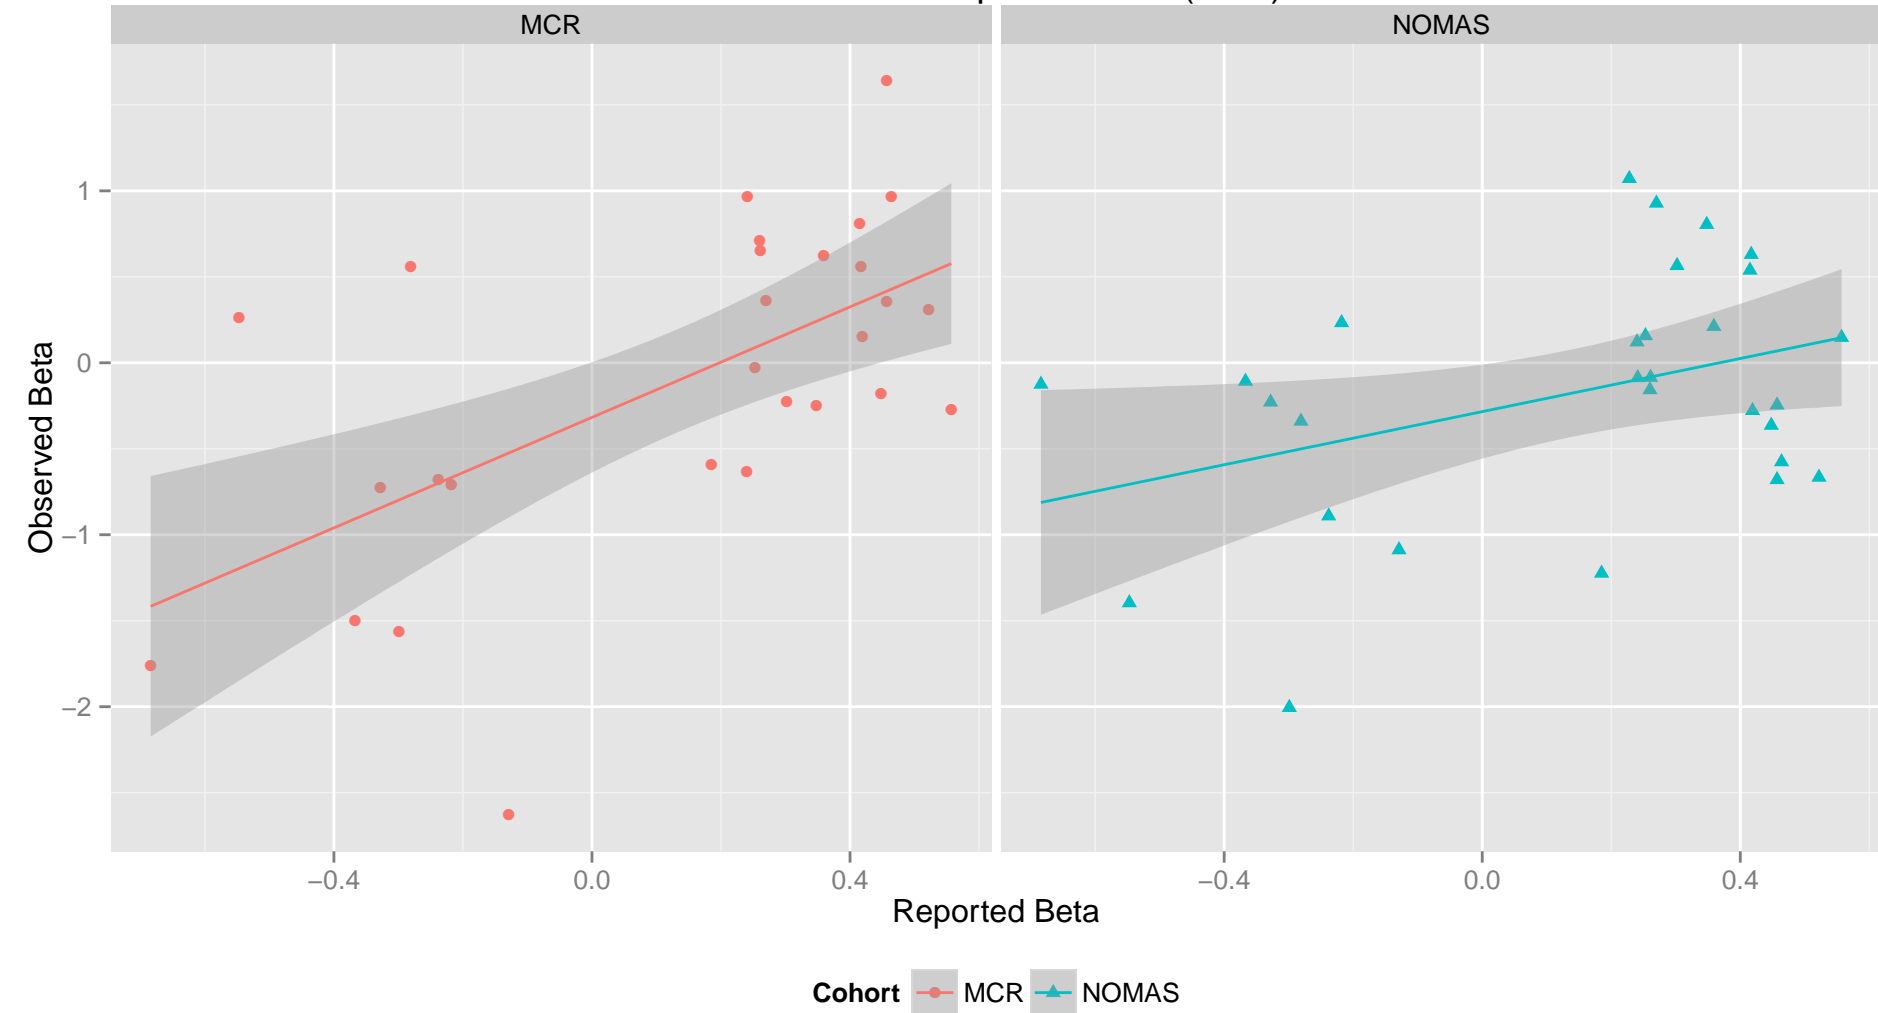

# Supplemental Figure 5

## MCR: SBP

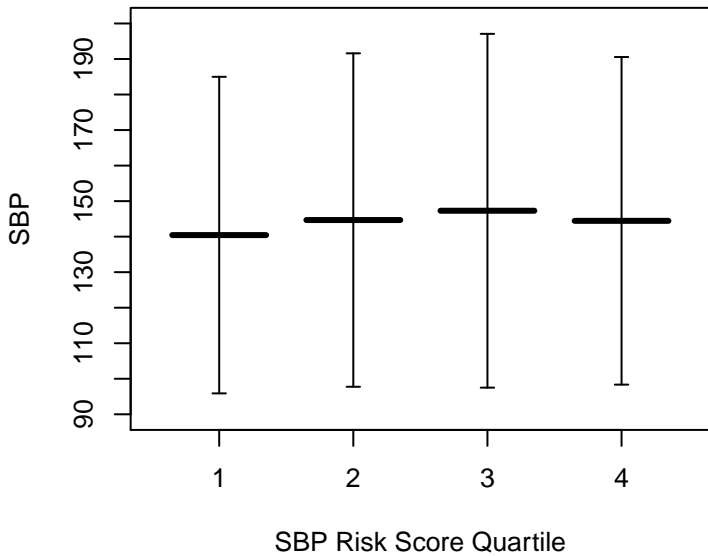

## NOMAS: SBP

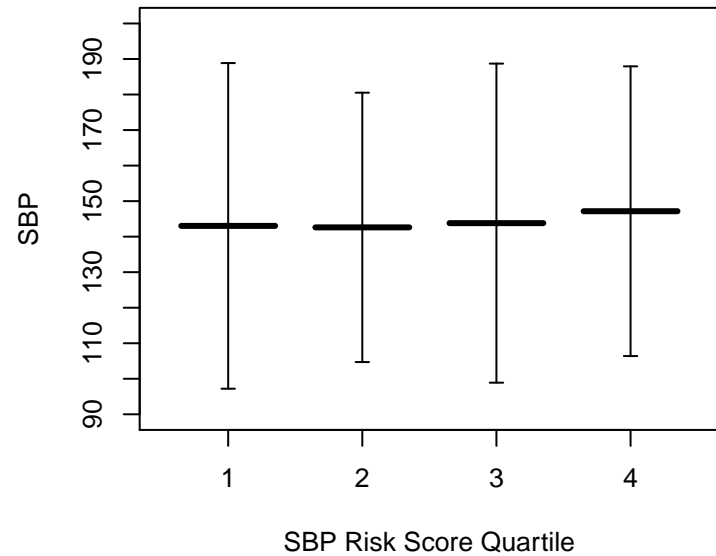

## MCR: DBP

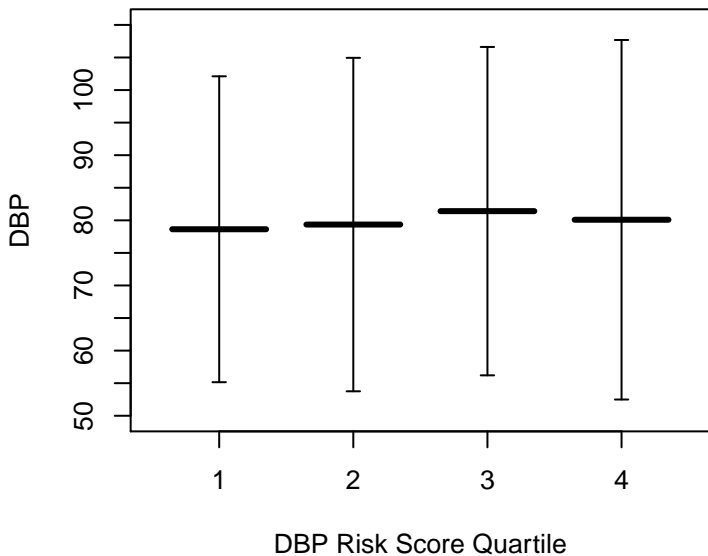

## NOMAS: DBP

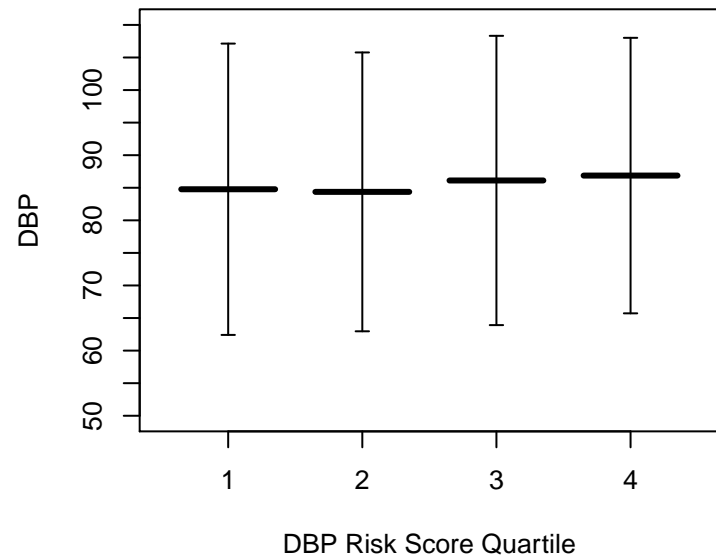

Supplement: NIHMS773807-supplement-1.pdf [file NIHMS773807-supplement-1.pdf]
